# Supplementary material for: Inhibitory Effects against Alpha-Amylase of an Enriched Polyphenol Extract from Pericarp of Mangosteen (Garcinia mangostana)
Source: MDPI journal article supplement (doi:10.3390/foods11071001), 2022-03-29
Supplement: s1 [file s1]

## Supplementary Materials

**Table S1.** Factors and levels chosen for the orthogonal array experiment for MPPs extraction.

| factors                          | level  |           |         |
|----------------------------------|--------|-----------|---------|
|                                  | low(1) | medium(2) | high(3) |
| A. solid to solvent ratio(mg/mL) | 1:40   | 1:45      | 1:50    |
| B. pH                            | 1.0    | 1.5       | 2.0     |
| C. temperature/ (°C)             | 60     | 70        | 80      |
| D. time/(h)                      | 1.0    | 1.5       | 2.0     |

**Table S2.** Orthogonal test results of extraction yield of MPPs

| number             | mangosteen<br>pericarp<br>powder/g | solid to<br>solvent<br>ratio(A) | pH(B)          | temperature(C)                                              | time(D)        | extraction<br>yield/% |
|--------------------|------------------------------------|---------------------------------|----------------|-------------------------------------------------------------|----------------|-----------------------|
| 1                  | 3.00                               | 1                               | 1              | 1                                                           | 1              | 2.65± 0.07            |
| 2                  | 3.00                               | 1                               | 2              | 2                                                           | 2              | 2.77 ± 0.09           |
| 3                  | 3.00                               | 1                               | 3              | 3                                                           | 3              | 2.98 ± 0.05           |
| 4                  | 3.00                               | 2                               | 1              | 2                                                           | 3              | 2.91 ± 0.04           |
| 5                  | 3.00                               | 2                               | 2              | 3                                                           | 1              | 3.07 ± 0.08           |
| 6                  | 3.00                               | 2                               | 3              | 1                                                           | 2              | 2.85 ± 0.05           |
| 7                  | 3.00                               | 3                               | 1              | 3                                                           | 2              | 3.08 ± 0.07           |
| 8                  | 3.00                               | 3                               | 2              | 1                                                           | 3              | 2.99 ± 0.06           |
| 9                  | 3.00                               | 3                               | 3              | 2                                                           | 1              | 3.09 ± 0.08           |
| K <sub>1</sub>     |                                    | 8.40                            | 8.64           | 8.49                                                        | 8.81           |                       |
| K <sub>2</sub>     |                                    | 8.83                            | 8.83           | 8.77                                                        | 8.70           |                       |
| K <sub>3</sub>     |                                    | 9.16                            | 8.92           | 9.13                                                        | 8.88           |                       |
| k <sub>1</sub>     |                                    | 2.80                            | 2.88           | 2.83                                                        | 2.94           |                       |
| k <sub>2</sub>     |                                    | 2.94                            | 2.94           | 2.92                                                        | 2.90           |                       |
| k <sub>3</sub>     |                                    | 3.05                            | 2.97           | 3.04                                                        | 2.96           |                       |
| R                  |                                    | 0.25                            | 0.09           | 0.21                                                        | 0.06           |                       |
| order              |                                    |                                 |                | A>C>B>D                                                     |                |                       |
| optimum<br>levels  |                                    | A <sub>3</sub>                  | B <sub>3</sub> | C <sub>3</sub>                                              | D <sub>3</sub> |                       |
| optimum<br>factors |                                    |                                 |                | A <sub>3</sub> B <sub>3</sub> C <sub>3</sub> D <sub>3</sub> |                |                       |

**Table S3.** Binding energy between  $\alpha$ -amylase with representative compounds in MPPs calculated by Autodock

| compound                            | binding energy(kcal/mol) | RMSD(Å) |
|-------------------------------------|--------------------------|---------|
| Garcimangosone D                    | -4.57                    | 2.290   |
| $\beta$ -mangostin                  | -4.50                    | 0.176   |
| Garcinone D                         | -4.47                    | 0.036   |
| Cyanidin-3- <i>O</i> -glucoside     | -3.96                    | 1.919   |
| Pelargonidin-3- <i>O</i> -glucoside | -4.85                    | 0.755   |
| Proanthocyanidin A2                 | -4.92                    | 0.001   |
| (E)C                                | -4.90                    | 0.001   |
